# Supplementary material for: Mycobacterium avium Subspecies paratuberculosis: Human Exposure through Environmental and Domestic Aerosols
Source: PubMed Central journal article supplement (PMC4243430; doi:10.3390/pathogens3030577), 2014-07-16
Supplement: pathogens-03-00577-s001.pdf [file pathogens-03-00577-s001.pdf]

## Supplementary

Table S1. PCR primers and hydrolysis probes used in this study. †

| Oligonucleotide                              | Sequence and Fluorophore/Quencher (5'→3') | Target Gene                                            | Reference                           |
|----------------------------------------------|-------------------------------------------|--------------------------------------------------------|-------------------------------------|
| pE (forward)                                 | AAACTCAAAGGAATTGACGG                      | Eubacterial 16S <i>rrn</i> gene                        | Edwards <i>et al.</i> (1989)        |
| pH' (reverse)                                | AAGGAGGTGATCCAGCCGCA                      | Eubacterial 16S <i>rrn</i> gene                        |                                     |
| MimmFP (forward)                             | TTGATGTGCAGACGGATTCC                      | <i>M. immunogenum rpoB</i>                             | Rhodes <i>et al.</i> (2008)         |
| MimmRP (reverse)                             | CAACCTCGCGCCAACG                          | <i>M. immunogenum rpoB</i>                             |                                     |
| MimmTP (hydrolysis probe)                    | VIC-TTGAATGGTTGGTCGGCTCGCC-TAMRA          | <i>M. immunogenum rpoB</i>                             |                                     |
| gMycFP* (forward)                            | GGGGTGTGGTGTGTTGAG                        | <i>Mycobacterium</i> genus 16S-23S <i>rrn</i> gene ITS | van Coppenraet <i>et al.</i> (2004) |
| gMycRP* (reverse)                            | CTCCCACGTCCTTCATC                         | <i>Mycobacterium</i> genus 16S-23S <i>rrn</i> gene ITS |                                     |
| gMycP* (hydrolysis probe)                    | 6FAM-TGGATAGTGGTTGCGAGCATC-TAMRA          | <i>Mycobacterium</i> genus 16S-23S <i>rrn</i> gene ITS |                                     |
| IS900qPCRf (forward)                         | GATGGCCGAAGGAGATTG                        | <i>M. avium</i> subsp. <i>paratuberculosis</i> IS900   | Slana <i>et al.</i> (2008)          |
| IS900qPCRR (reverse)                         | CACAACCACCTCCGTAACC                       | <i>M. avium</i> subsp. <i>paratuberculosis</i> IS900   |                                     |
| IS900qPCRTM (hydrolysis probe)               | 6FAM-ATTGGATCGCTGTGTAAGGACACGT-BHQ        | <i>M. avium</i> subsp. <i>paratuberculosis</i> IS900   |                                     |
| F57-F (forward)                              | TACGAGCACGCAGGCATTC                       | <i>M. avium</i> subsp. <i>paratuberculosis</i> F57     | Schönenbrücher <i>et al.</i> (2008) |
| F57-R (reverse)                              | CGGTCCAGTTCGCTGTCAT                       | <i>M. avium</i> subsp. <i>paratuberculosis</i> F57     |                                     |
| F57 Taqman <sub>mgb</sub> (hydrolysis probe) | VIC-CCTGACCACCCTTC-MGB                    | <i>M. avium</i> subsp. <i>paratuberculosis</i> F57     |                                     |

\* Our designation as oligonucleotides were originally simply forward and reverse primers Taqman probe when described in van Coppenraet *et al.* (2004).

† This table is the same with Table 4 in text. The duplication caused by an omission.
